# Supplementary material for: A TrxR inhibiting gold(I) NHC complex induces apoptosis through ASK1-p38-MAPK signaling in pancreatic cancer cells
Source: PubMed Central journal article supplement (PMC4190468; doi:10.1186/1476-4598-13-221), 2014-09-25

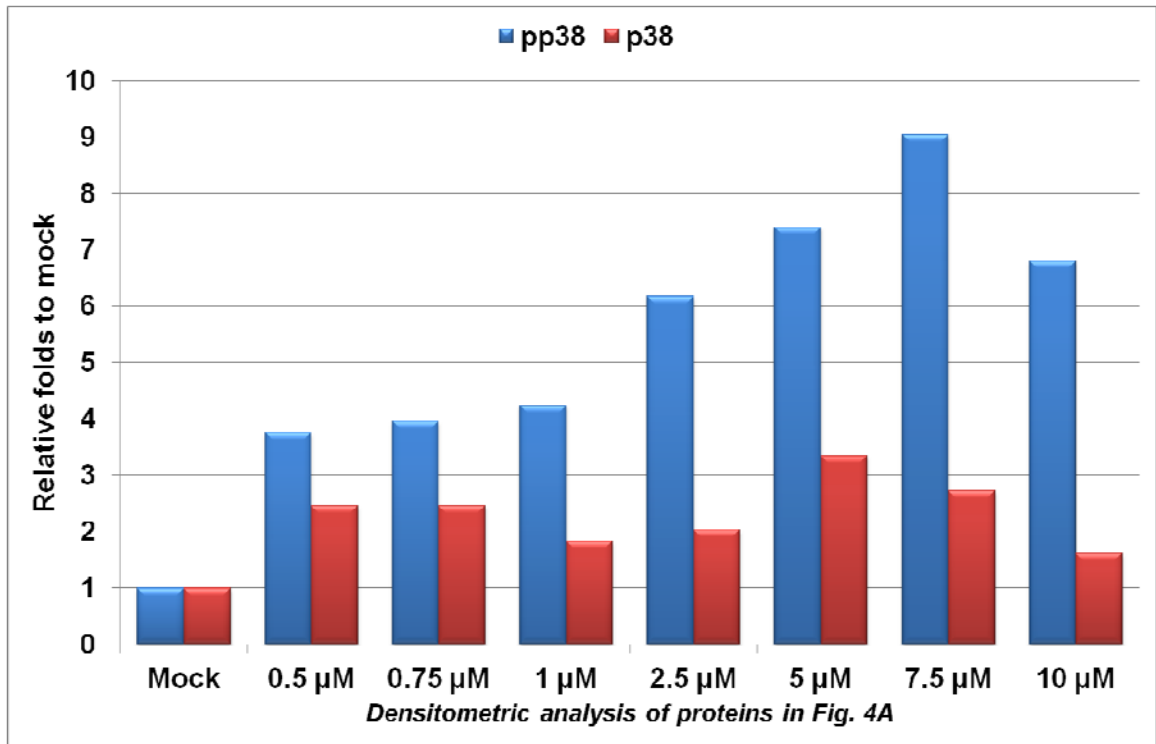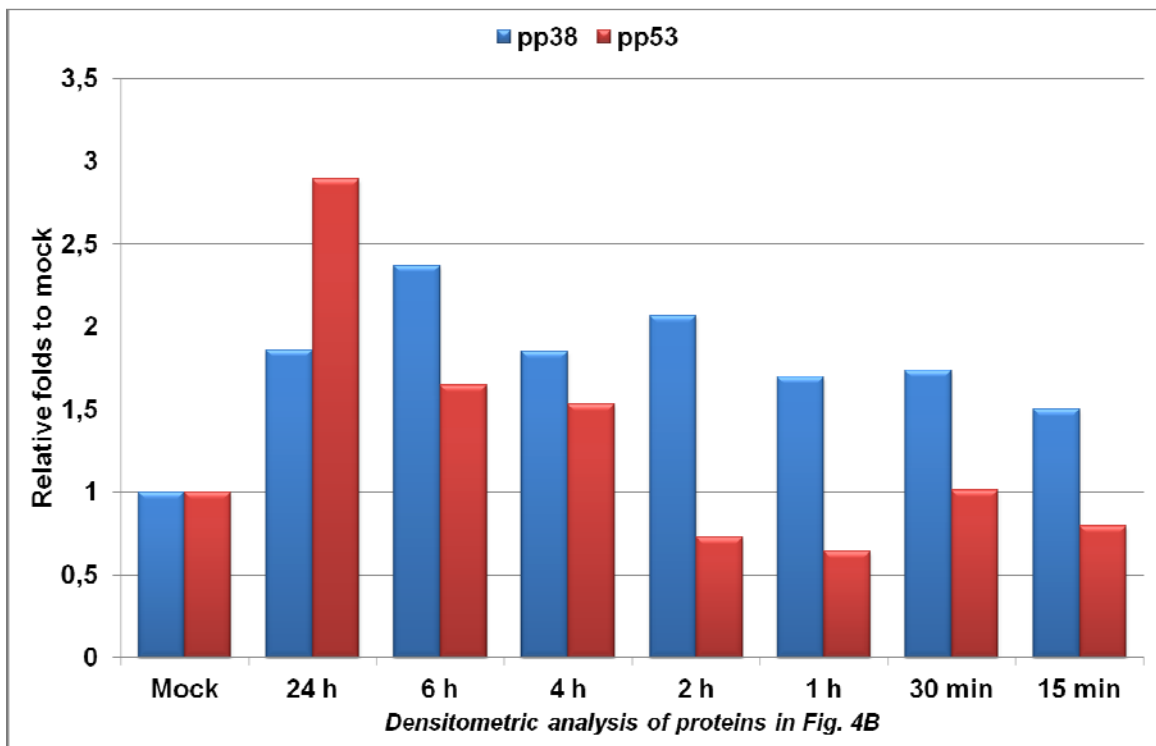

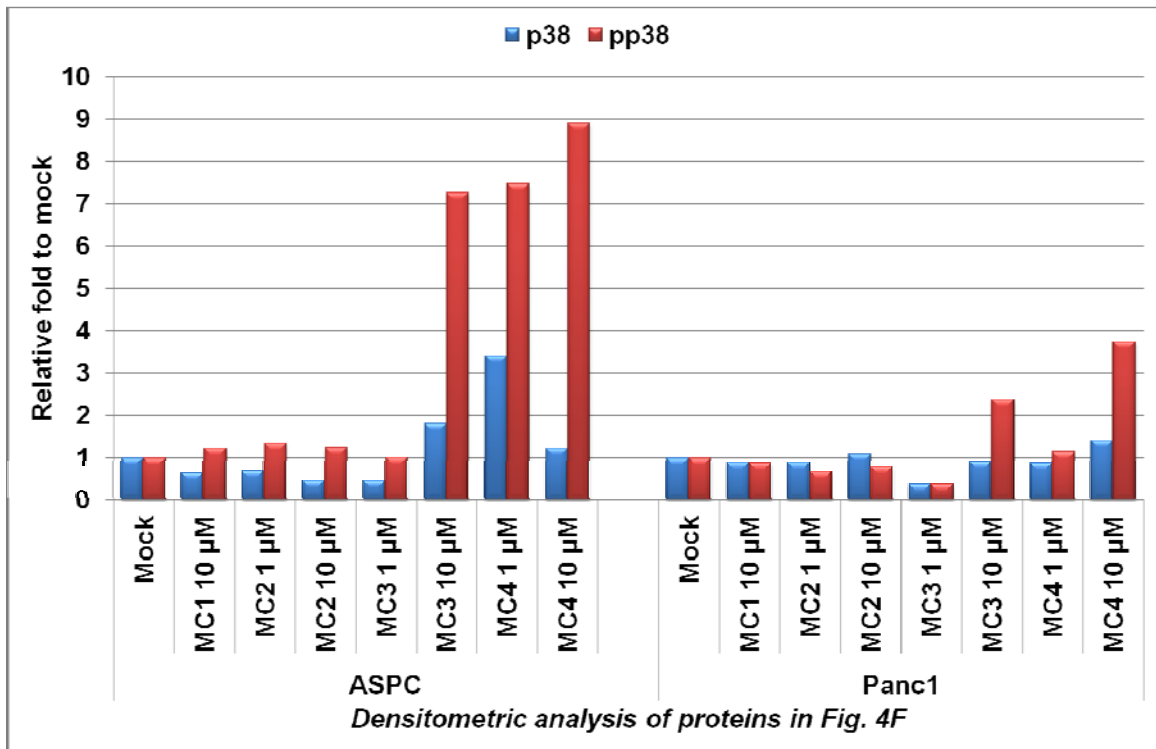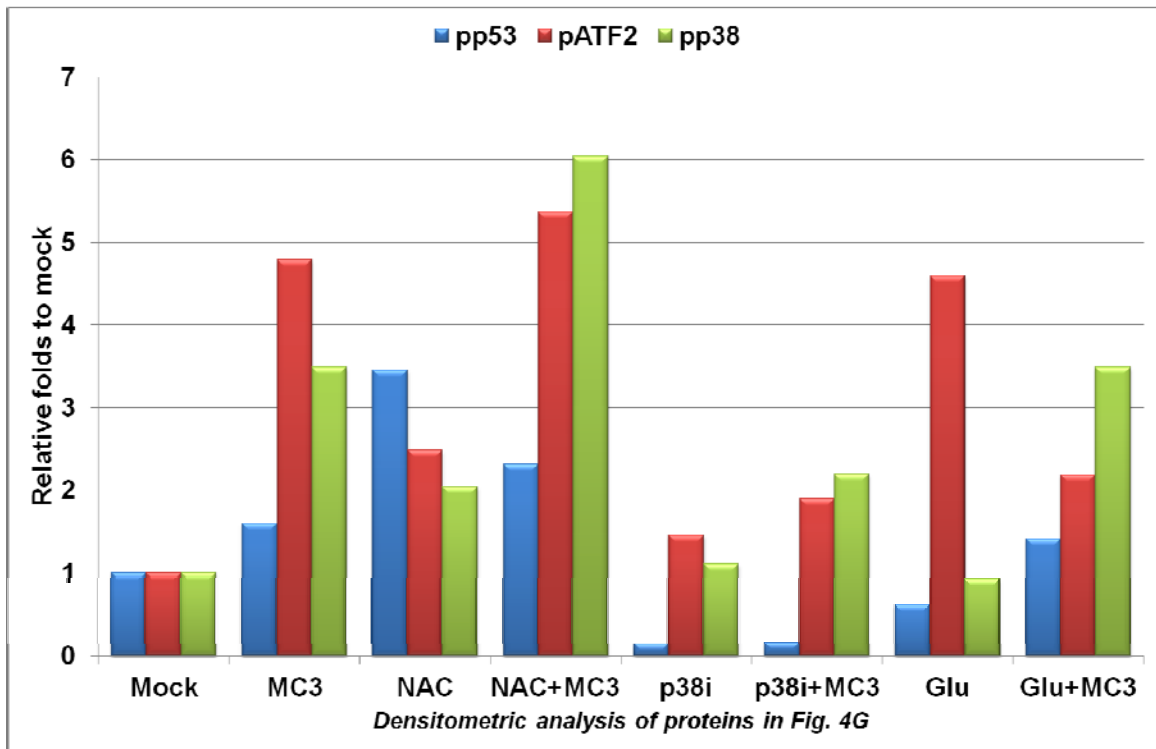

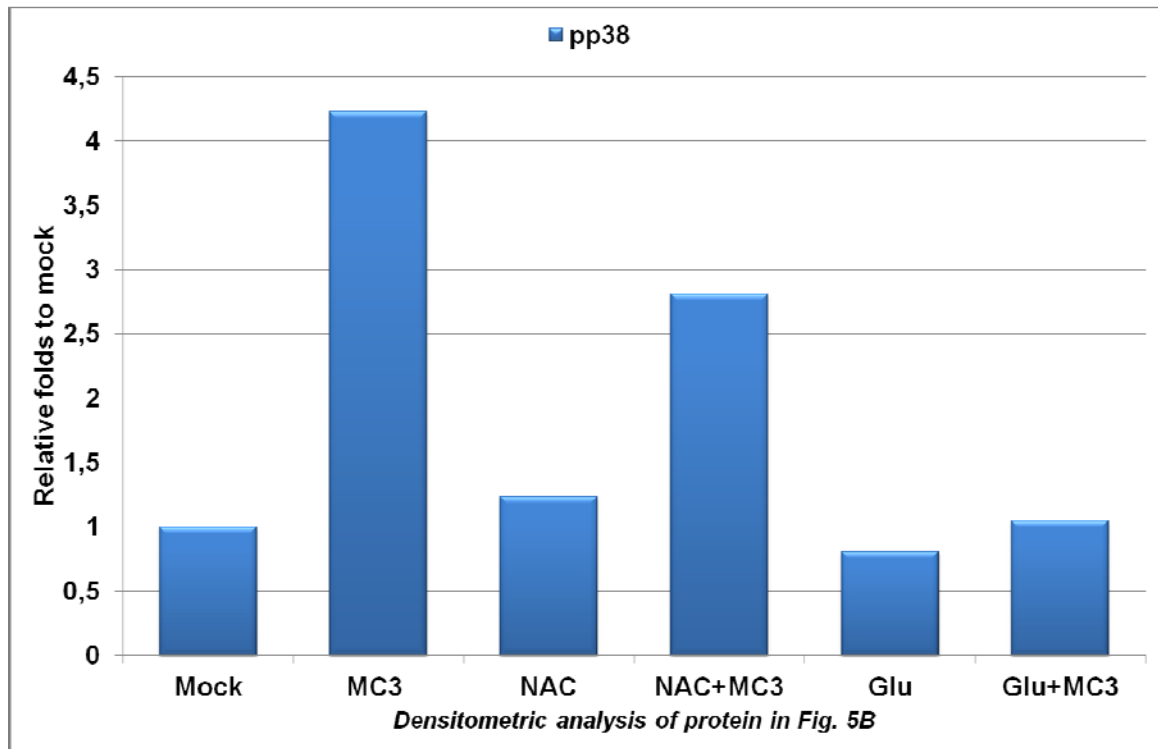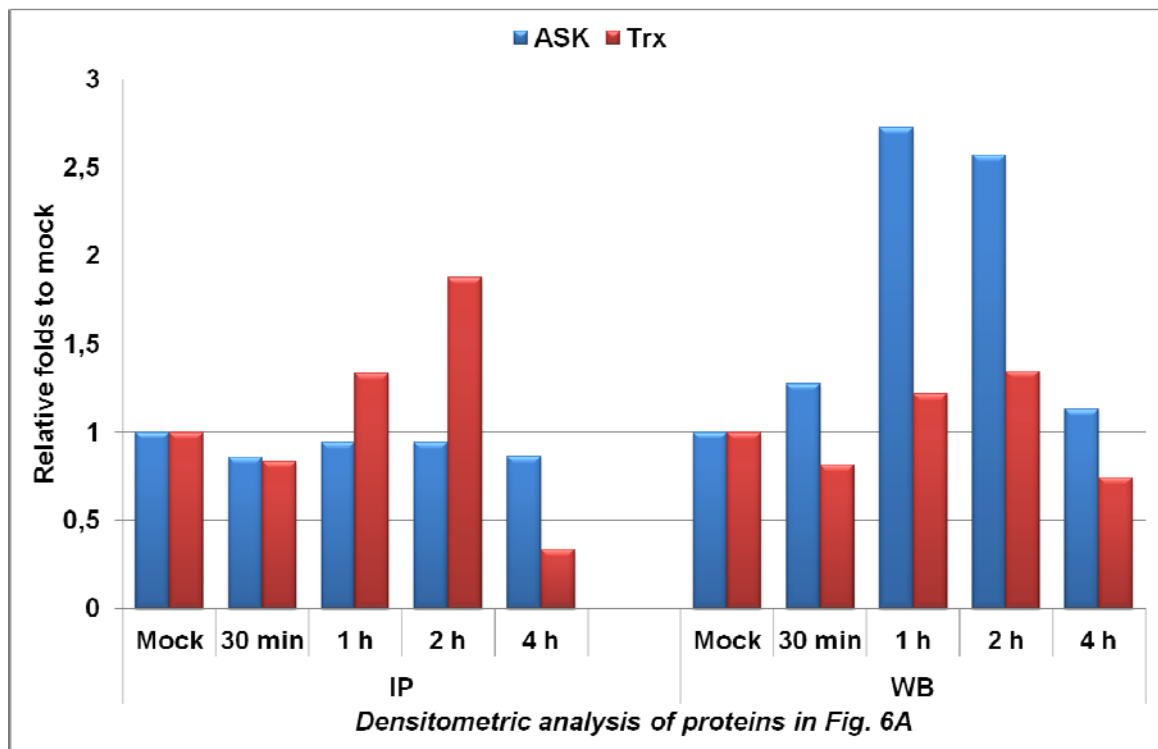

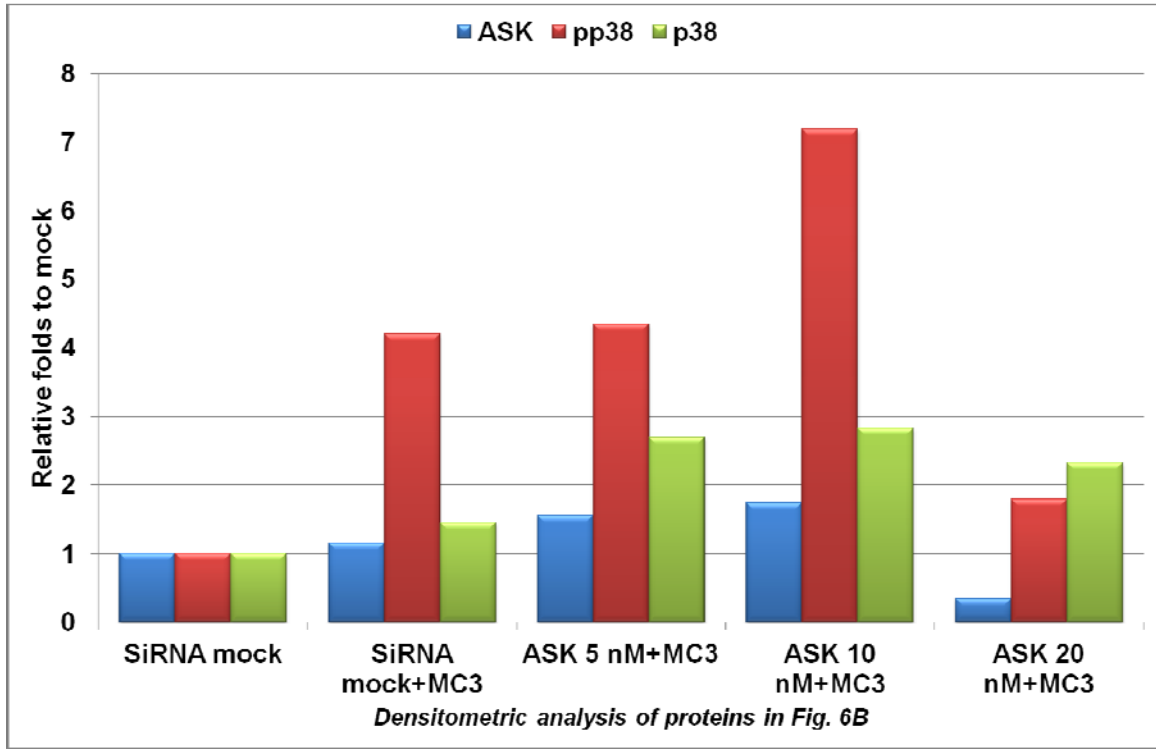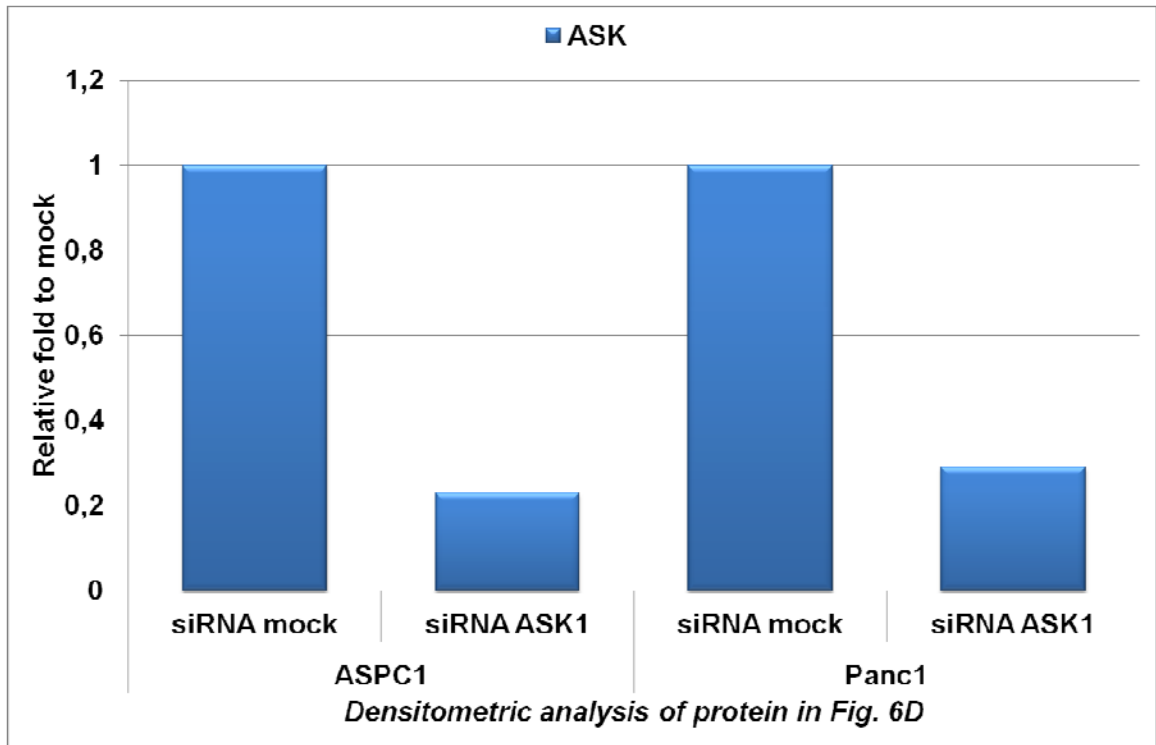

Supplement: 12943_2014_1424_MOESM1_ESM.pdf [file 12943_2014_1424_MOESM1_ESM.pdf]
